# Supplementary material for: Lipidomic-based investigation into the regulatory effect of Schisandrin B on palmitic acid level in non-alcoholic steatotic livers
Source: PubMed Central journal article supplement (PMC4358044; doi:10.1038/srep09114), 2015-03-13
Supplement: srep09114-s1.pdf [file srep09114-s1.pdf]

## Lipidomic-based investigation into the regulatory effect of Schisandrin B on palmitic acid level in non-alcoholic steatotic livers

Hiu Yee Kwan<sup>1,2</sup>, Xuyan Niu<sup>3</sup>, Wenlin Dai<sup>4</sup>, Tiejun Tong<sup>4</sup>, Xiaojuan Chao<sup>1,2</sup>, Tao Su<sup>1,2</sup>, Chi Leung Chan<sup>1</sup>, Kim Chung Lee<sup>5,6</sup>, Xiuqiong Fu<sup>1,2</sup>, Yi Hua<sup>7</sup>, Yu Hua<sup>1,2</sup>, Li Ting<sup>1,2</sup>, Anfernee Kai Wing Tse<sup>1,2</sup>, Wang Fun Fong<sup>1,2</sup>, Si-Yuan Pan<sup>8</sup>, Aiping Lu<sup>1,2§</sup>, Zhi-Ling Yu<sup>1,2§</sup>

Supplementary Figure S1

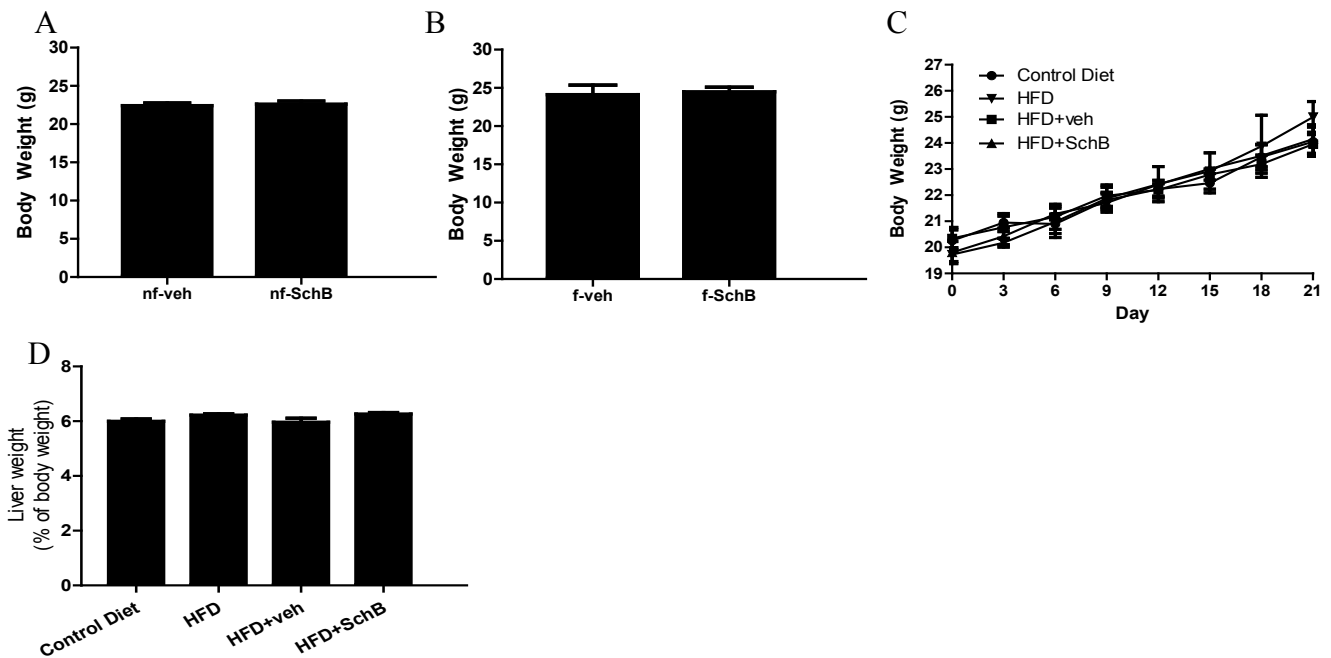

**Supplementary Figure S1.** Body weights of mice in (A) non-fasting group (nf), (B) fasting group (f) and (C) HFD-fed group (HFD). (D) Liver weights of HFD-fed mice. *nf-veh*: non-fasting vehicle control group; *nf-SchB*: non-fasting SchB-treated group; *f-veh*: fasting vehicle control group; *f-SchB*: fasting SchB-treated group; *HFD-veh*: HFD-fed vehicle control group; *HFD-SchB*: HFD-fed SchB-treated group. Shown is the mean  $\pm$  SE (n=10 mice).

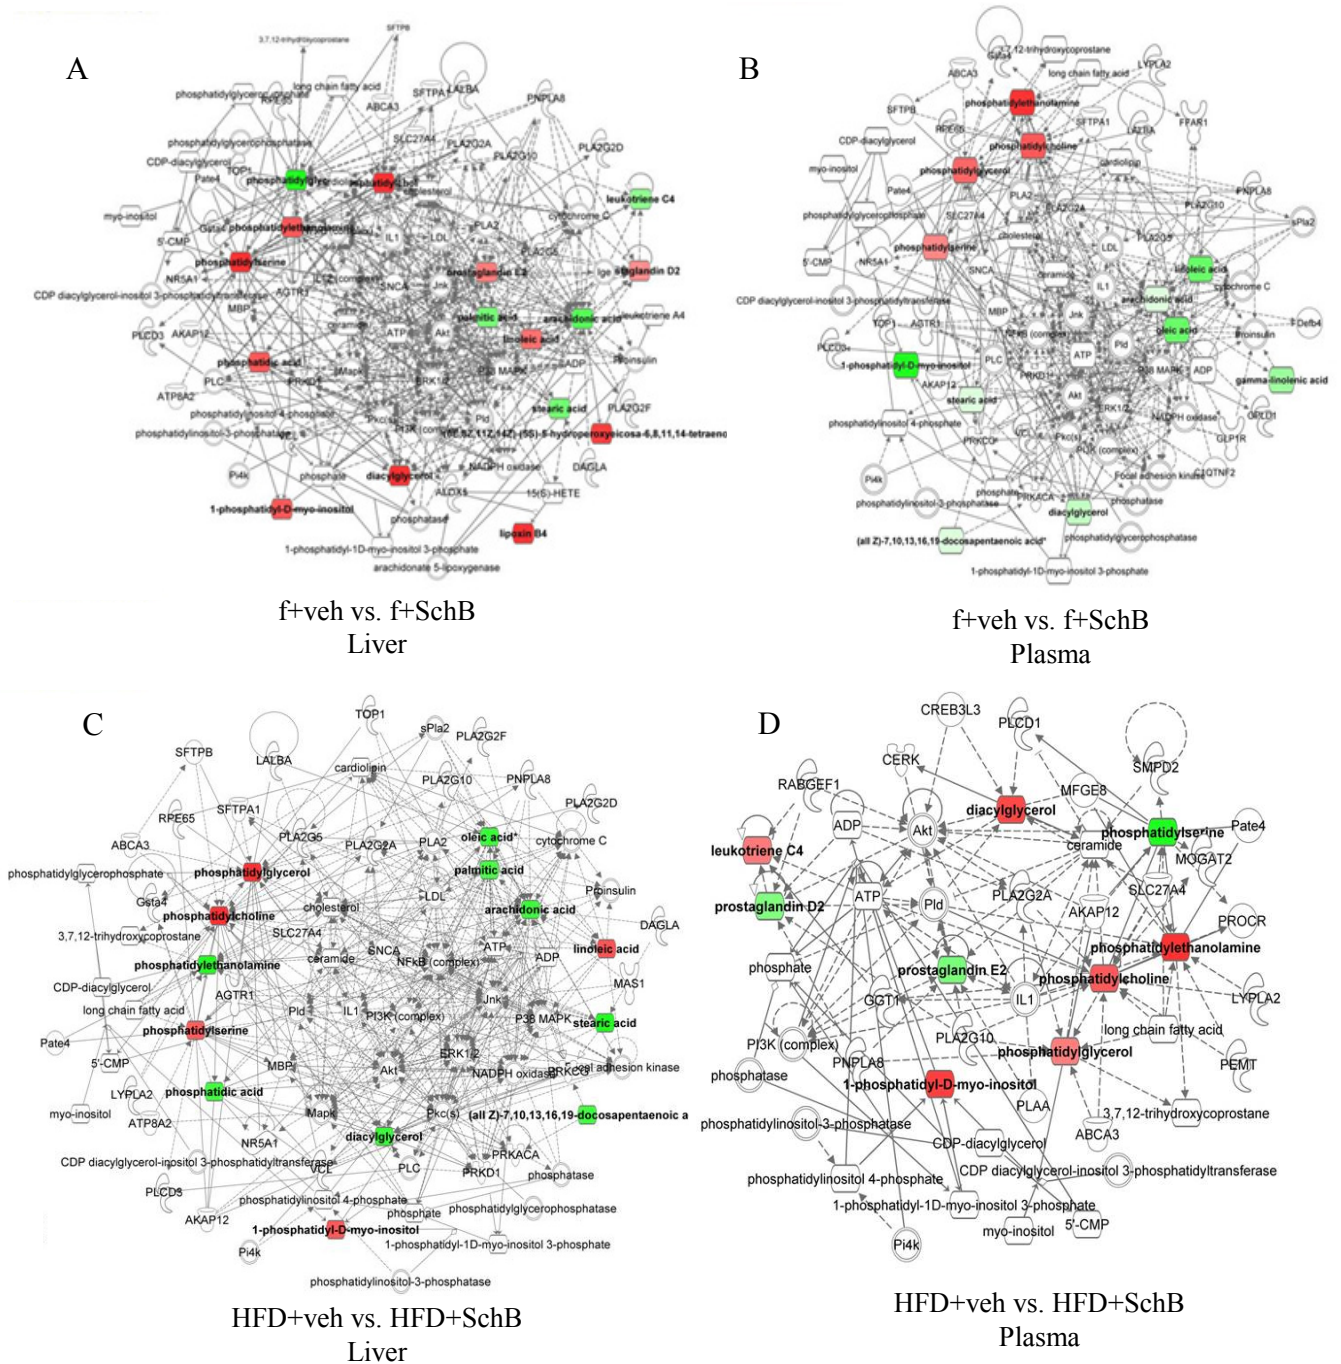

**Supplementary Figure S2.** Molecular network built based on the lipid species in (A) liver and (B) plasma samples in fasting mice; and (C) liver and (D) plasma samples in HFD-fed mice. Lipid entities are represented as nodes, and the biological relationship between two nodes is represented as a line. Colored symbols represent the lipid entities occurred in our analysis, transparent entries are the entities from Ingenuity Knowledge Database. Red symbols represent up-regulated entities, green symbols represent down-regulated entities. Solid lines between the lipid entities indicate a direct physical relationship between the entities, dotted lines indicate indirect functional relationships. *f-veh*: fasting vehicle control group; *f-SchB*: fasting SchB-treated group; *HFD-veh*: HFD-fed vehicle control group; *HFD-SchB*: HFD-fed SchB-treated group

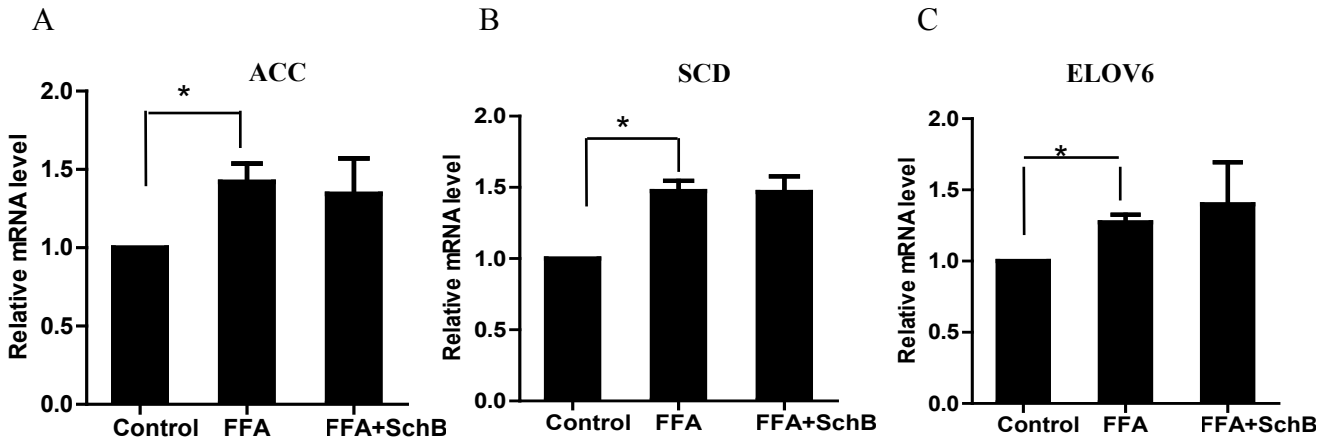

**Supplementary Figure S3.** The relative mRNA expressions of (A) acetyl CoA carboxylase (ACC), (B) stearoyl-CoA desaturase-1(SCD) and (C) elongation of long chain fatty acids family member 6 (ELOV6) in FFA-treated MIHA cells. Shown is the mean  $\pm$  SE (n=3 independent experiments), \* $p < 0.05$ .

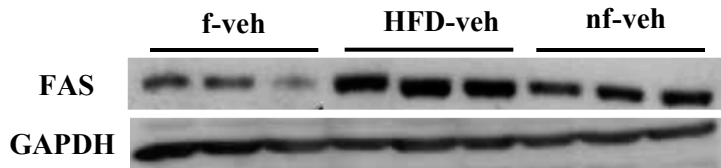

**Supplementary Figure S4.** Hepatic protein expressions of fatty acid synthase (FAS) in fasting, non-fasting and HFD-fed mice. *nf-veh*: non-fasting vehicle control group; *f-veh*: fasting vehicle control group; *HFD-veh*: HFD-fed vehicle control group

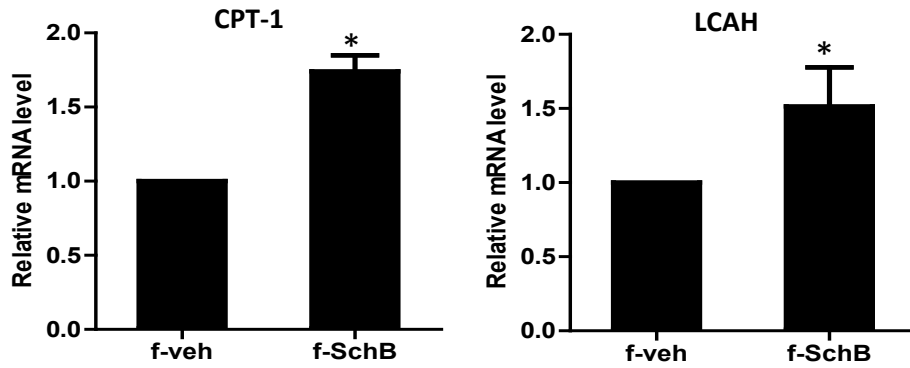

**Supplementary Figure S5.** Relative mRNA expression of carnitine palmitoyltransferase -1 (CPT-1) and very-long-chain acyl CoA dehydrogenase (LCAH) in fasting mice. *f-veh*: fasting vehicle control group; *f-SchB*: SchB-treated fasting group. Shown is the mean  $\pm$  SE (n=4 mice), \* $p$ <0.05.

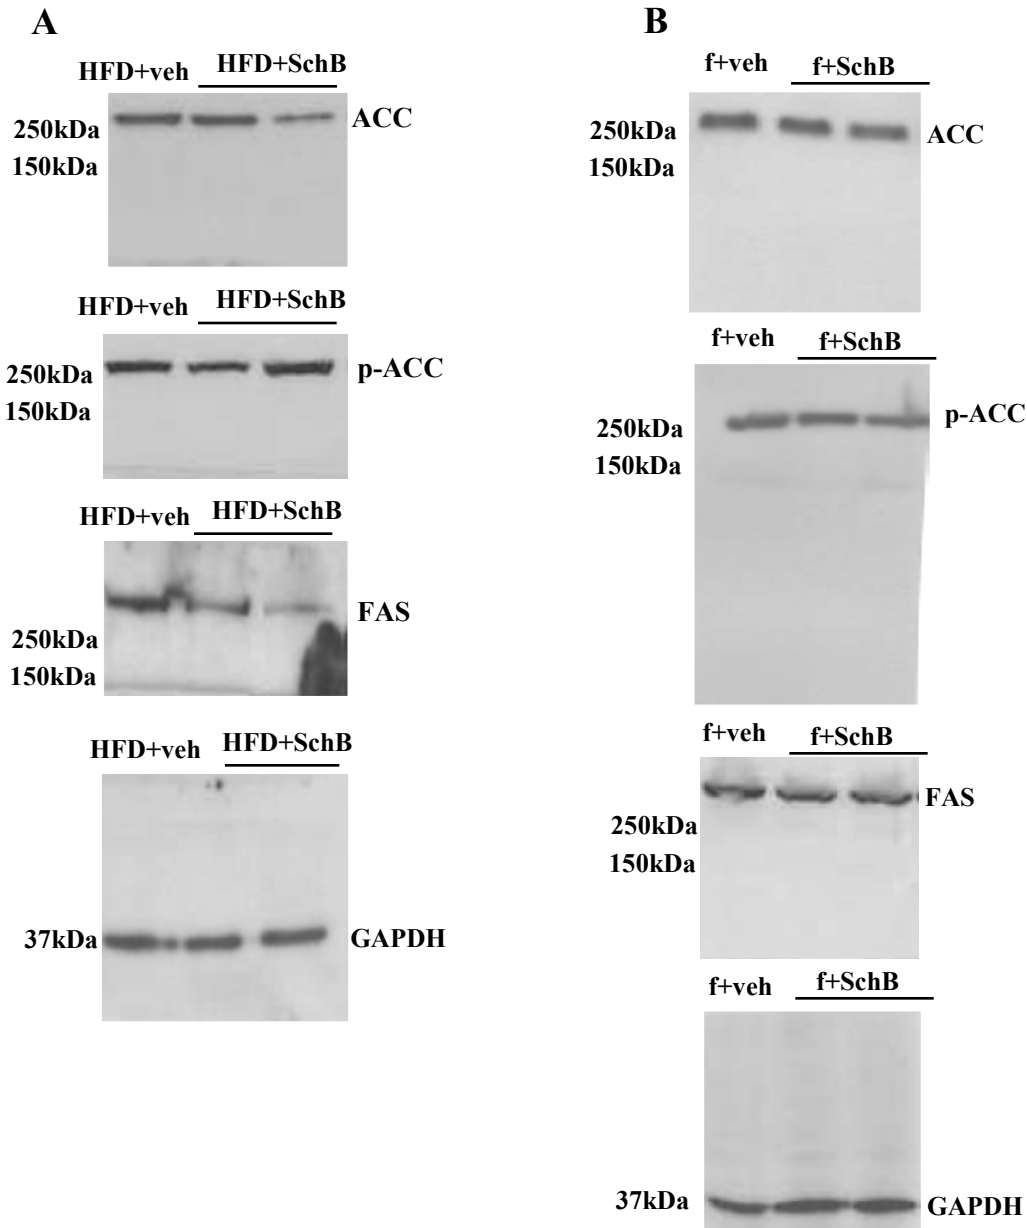

**Supplementary S6** SchB treatment affects lipogenic gene expressions in long-term HFD-fed mice. Western blotting showing the expressions of acetyl CoA carboxylase (ACC), phospho-ACC (ser-563) and fatty acid synthase (FAS) in (A) HFD-fed mouse livers, (B) fasting mouse livers and (C) non-fasting mouse livers. nf-veh: non-fasting vehicle control group; nf-SchB: non-fasting SchB-treated group; f-veh: fasting vehicle control group; f-SchB: fasting SchB-treated group; HFD-veh: HFD-fed vehicle control group; HFD-SchB: HFD-fed SchB-treated group. (G) expressions of ACC, phospho-ACC (ser-563) and FAS in FFA-treated MIHA cells. FFA: FFA-treated vehicle control MIHA cells; FFA+SchB: FFA-treated SchB-treated MIHA cells.

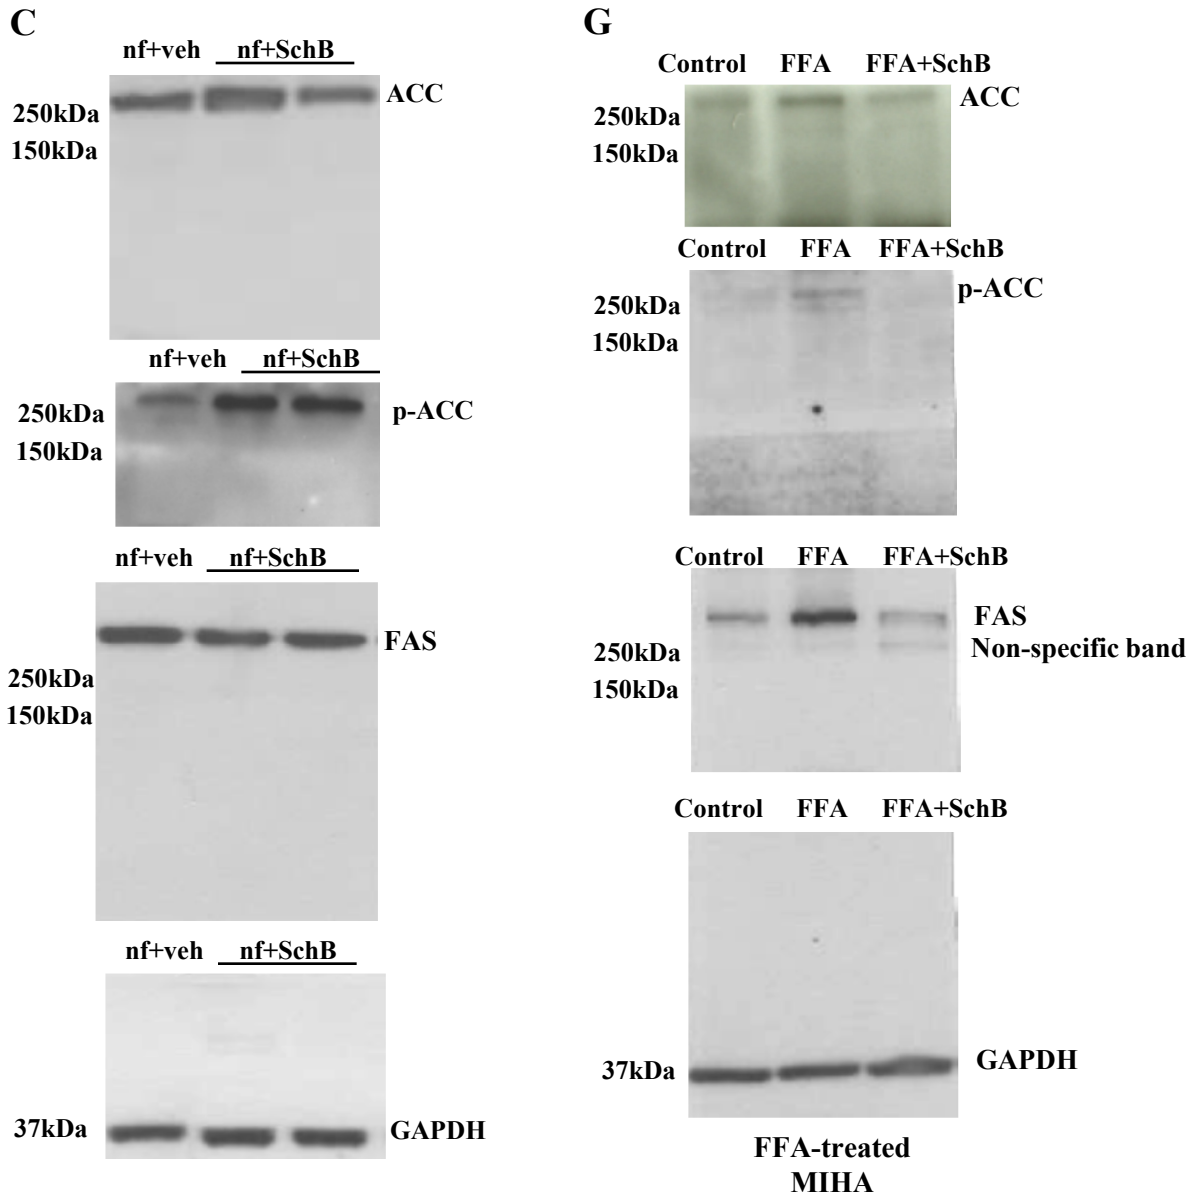

**Supplementary S6** SchB treatment affects lipogenic gene expressions in long-term HFD-fed mice

Western blotting showing the expressions of acetyl CoA carboxylase (ACC), phospho-ACC (ser-563) and fatty acid synthase (FAS) in (A) HFD-fed mouse livers, (B) fasting mouse livers and (C) non-fasting mouse livers.. nf-veh: non-fasting vehicle control group; nf-SchB: non-fasting SchB-treated group; f-veh: fasting vehicle control group; f-SchB: fasting SchB-treated group; HFD-veh: HFD-fed vehicle control group; HFD-SchB: HFD-fed SchB-treated group. (G) expressions of ACC, phospho-ACC (ser-563) and FAS in FFA-treated MIHA cells. FFA: FFA-treated vehicle control MIHA cells; FFA+SchB: FFA-treated SchB-treated MIHA cells.

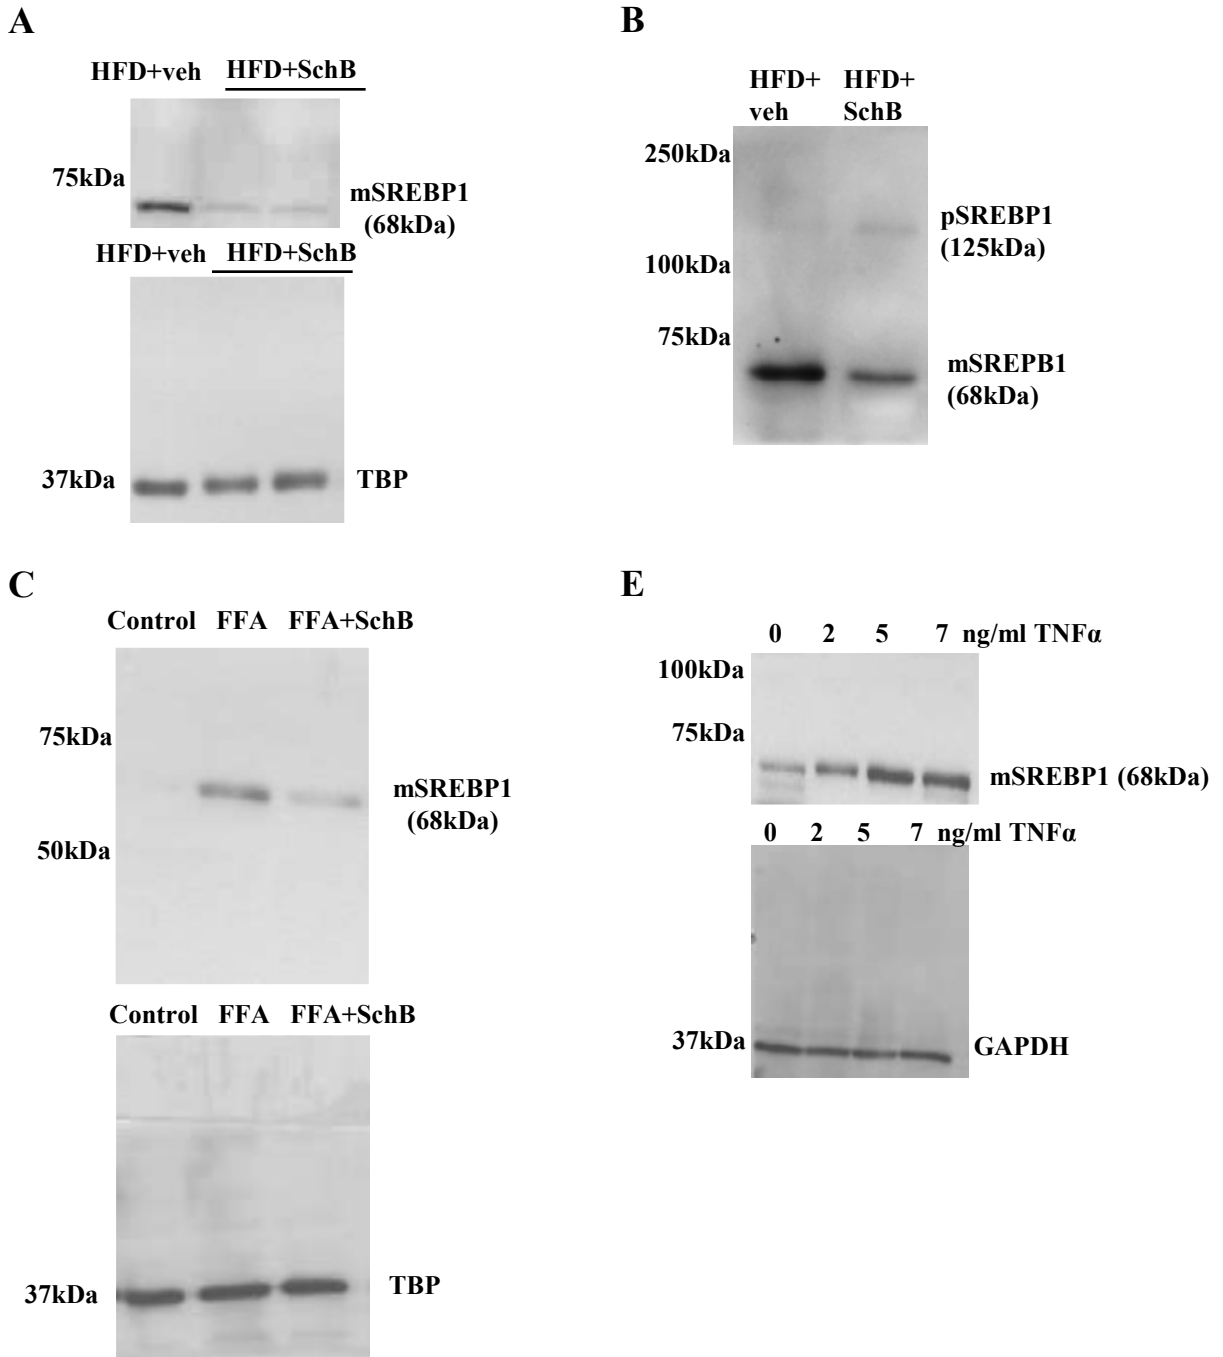

### Supplementary S7 SchB treatment affects SREBP-1 expressions in long-term HFD-fed mice

Western blotting showing (A) expression of mature sterol regulatory element binding protein-1 (mSREBP-1), (B) ratio of precursor to mature SREBP-1 and (I) tumor necrosis factor (TNF- $\alpha$ ) in HFD-fed mouse livers. (C) Protein expression of mature SREBP-1 (mSREBP-1) in FFA-treated MIHA cells. FFA: FFA-treated vehicle control MIHA cells; FFA+SchB: FFA-treated SchB-treated MIHA cells. Protein expressions of (E, G) mSREBP-1 and (F) FAS upon TNF- $\alpha$  challenges, and (H) protein expressions of TNF- $\alpha$  in FFA-treated MIHA cells. FFA: FFA-treated vehicle control MIHA cells; FFA+SchB: FFA-treated SchB-treated MIHA cells



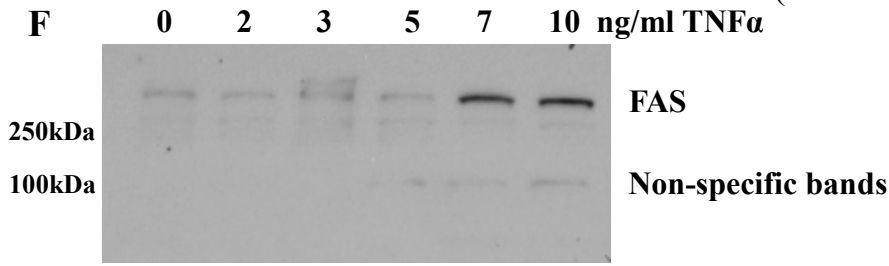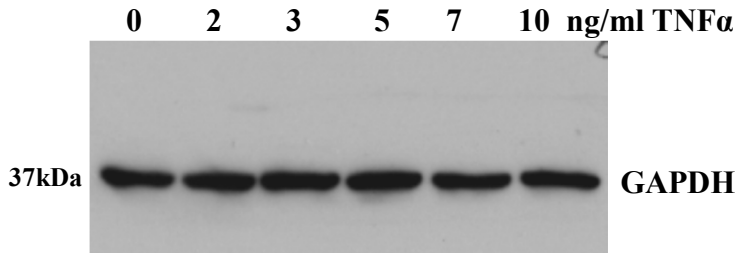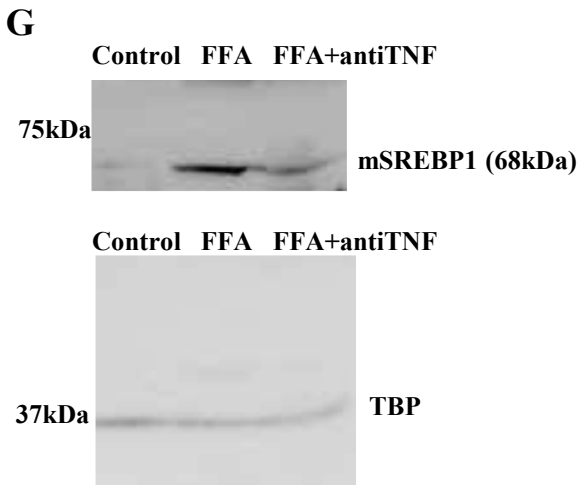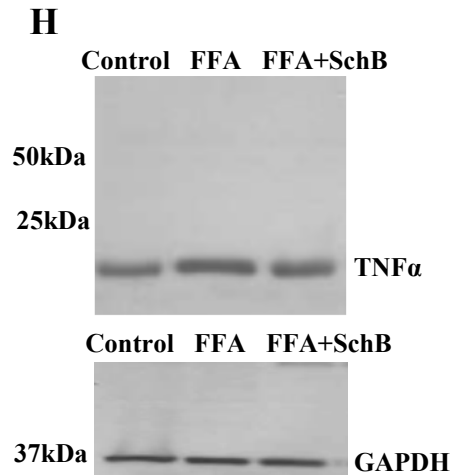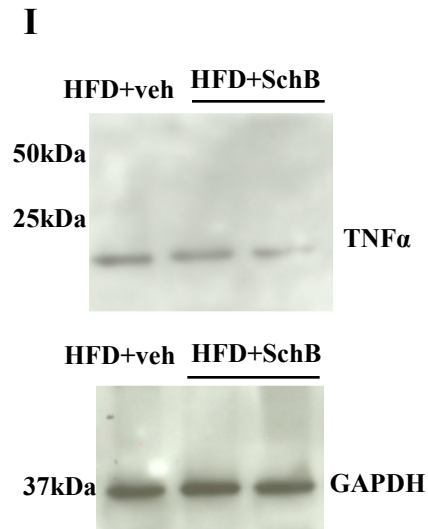

**Supplementary S7** SchB treatment affects SREBP-1 expressions in long-term HFD-fed mice

Western blotting showing (A) expression of mature sterol regulatory element binding protein-1 (mSREBP-1), (B) ratio of precursor to mature SREBP-1 and (I) tumor necrosis factor (TNF- $\alpha$ ) in HFD-fed mouse livers. (C) Protein expression of mature SREBP-1 (mSREBP-1) in FFA-treated MIHA cells. FFA: FFA-treated vehicle control MIHA cells; FFA+SchB: FFA-treated SchB-treated MIHA cells. Protein expressions of (E, G) mSREBP-1 and (F) FAS upon TNF- $\alpha$  challenges, and (H) protein expressions of TNF- $\alpha$  in FFA-treated MIHA cells. FFA: FFA-treated vehicle control MIHA cells; FFA+SchB: FFA-treated SchB-treated MIHA cells

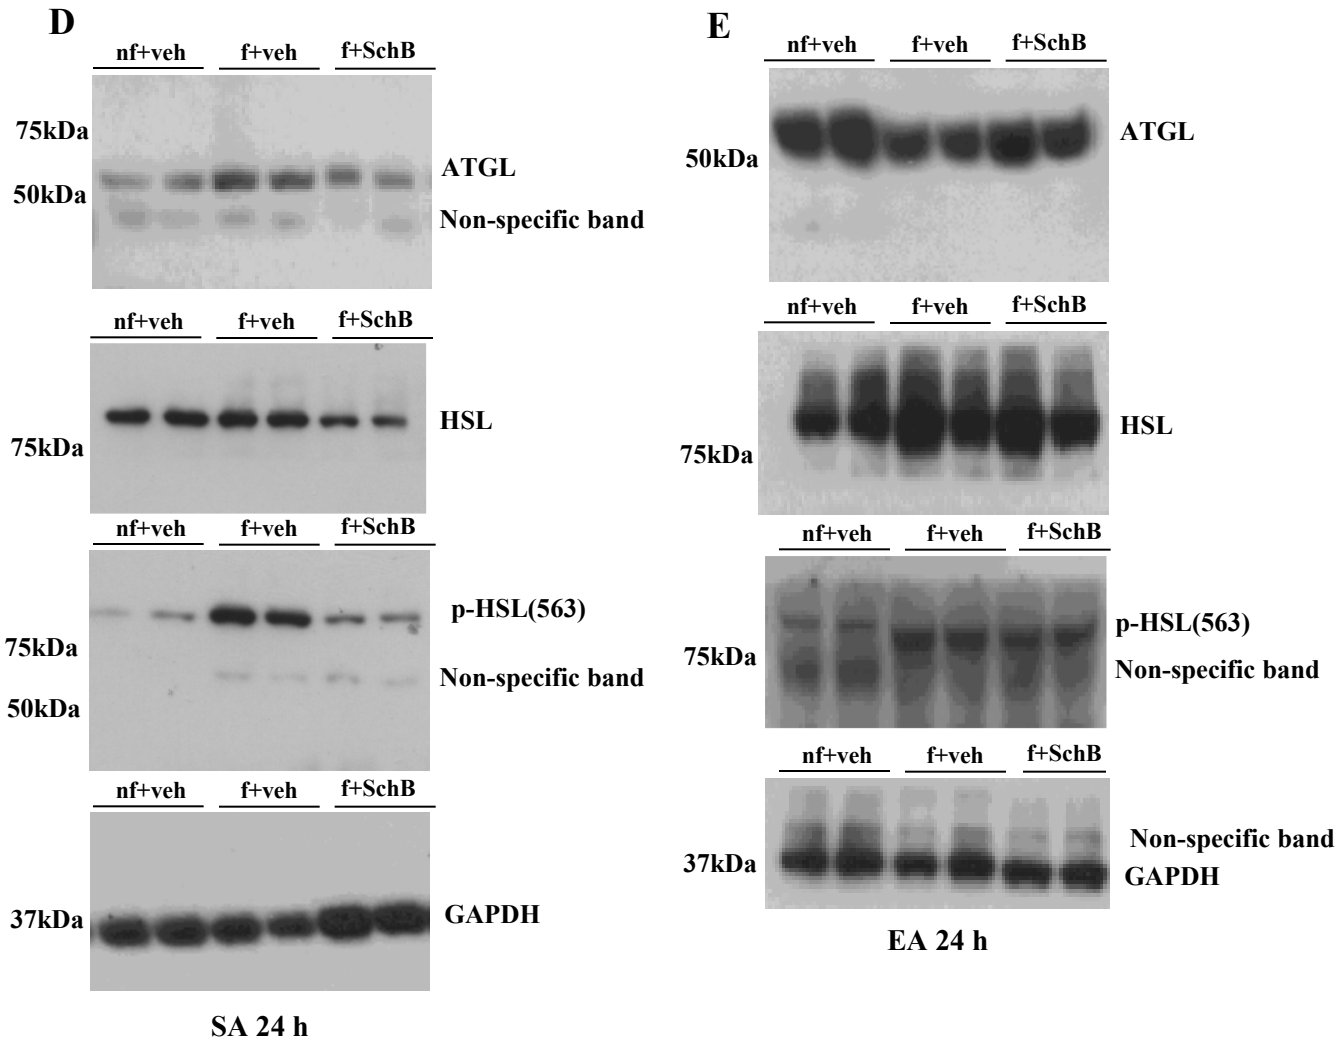

### Supplementary S8 SchB treatment induces transient lipolysis in fasting mice

Western blotting showing the expressions of adipose triglyceride lipase (ATGL), hormone sensitive lipase (HSL), phospho-HSL (Ser-563) in adipocytes isolated from the bilateral superficial subcutaneous adipose tissue (SA), prominent bilateral intra-abdominal visceral depots attached to the epididymides (EA) and the perirenal fat (RA) (D-E) 24 h after fasting, (F) 2 h after fasting, (G) 6 h after fasting and (H) 12 h after fasting. nf-veh: non-fasting vehicle control group; nf-SchB: non-fasting SchB-treated group; f-veh: fasting vehicle control group; f-SchB: fasting SchB-treated group; HFD-veh: HFD-fed vehicle control group; HFD-SchB: HFD-fed SchB-treated group.

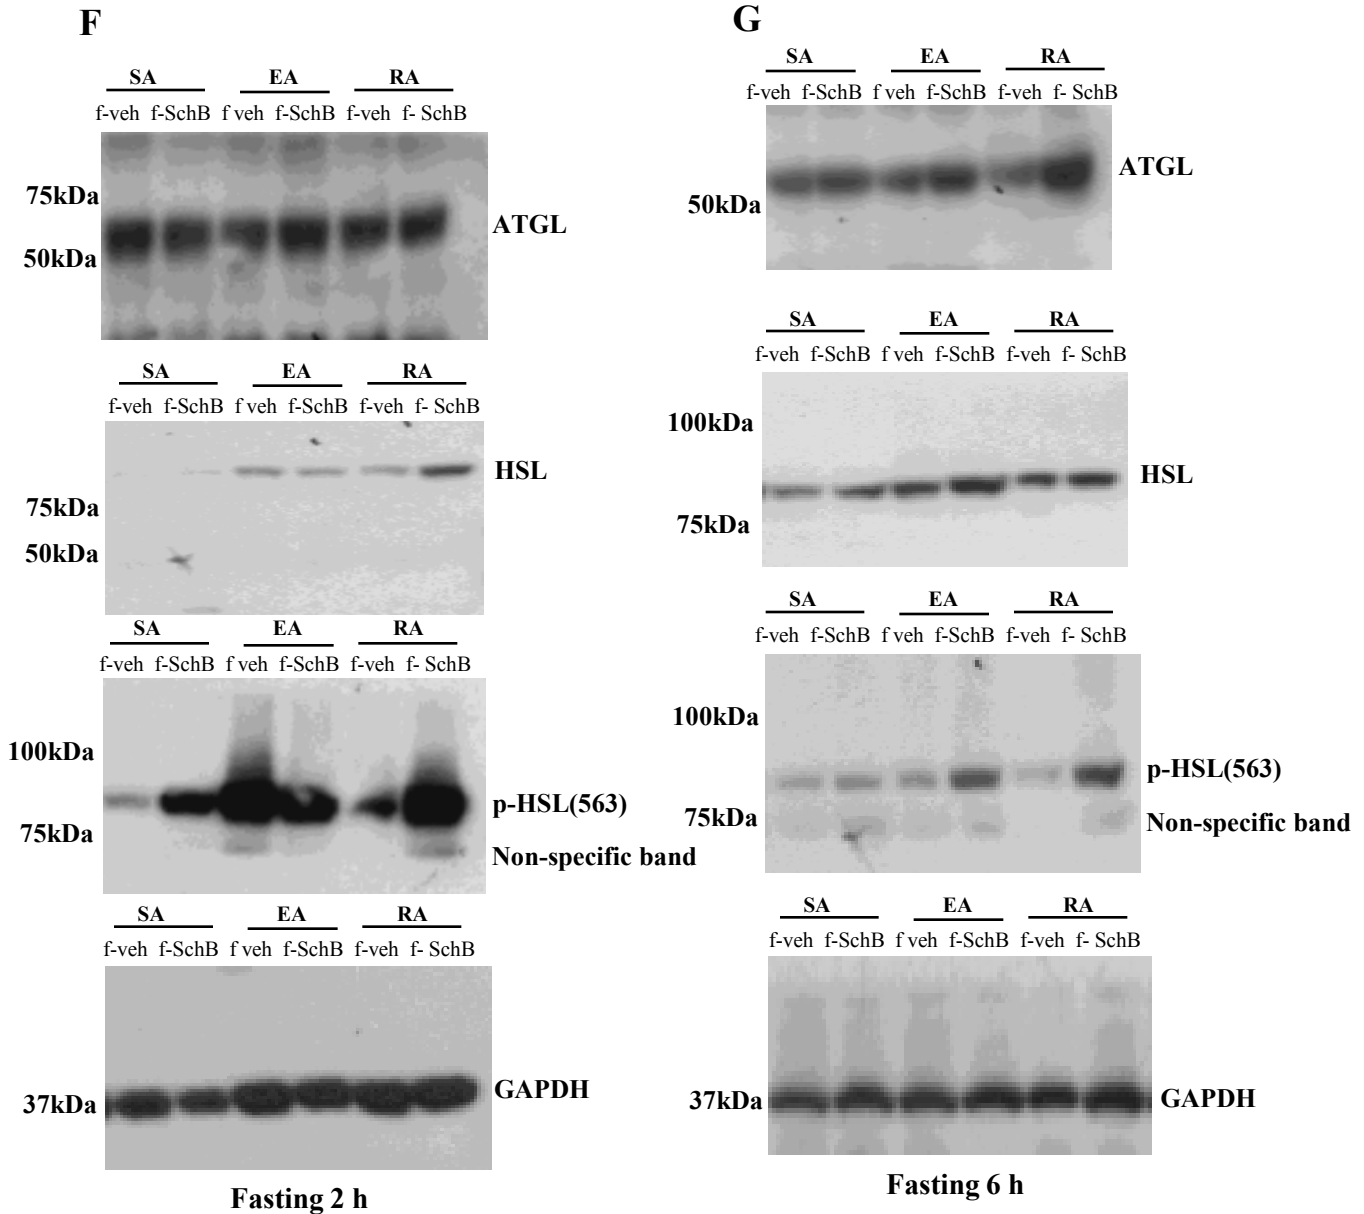

### Supplementary S8 SchB treatment induces transient lipolysis in fasting mice

Western blotting showing the expressions of adipose triglyceride lipase (ATGL), hormone sensitive lipase (HSL), phospho-HSL (Ser-563) in adipocytes isolated from the bilateral superficial subcutaneous adipose tissue (SA), prominent bilateral intra-abdominal visceral depots attached to the epididymides (EA) and the perirenal fat (RA) (D-E) 24 h after fasting, (F) 2 h after fasting, (G) 6 h after fasting and (H) 12 h after fasting. nf-veh: non-fasting vehicle control group; nf-SchB: non-fasting SchB-treated group; f-veh: fasting vehicle control group; f-SchB: fasting SchB-treated group; HFD-veh: HFD-fed vehicle control group; HFD-SchB: HFD-fed SchB-treated group.

**H**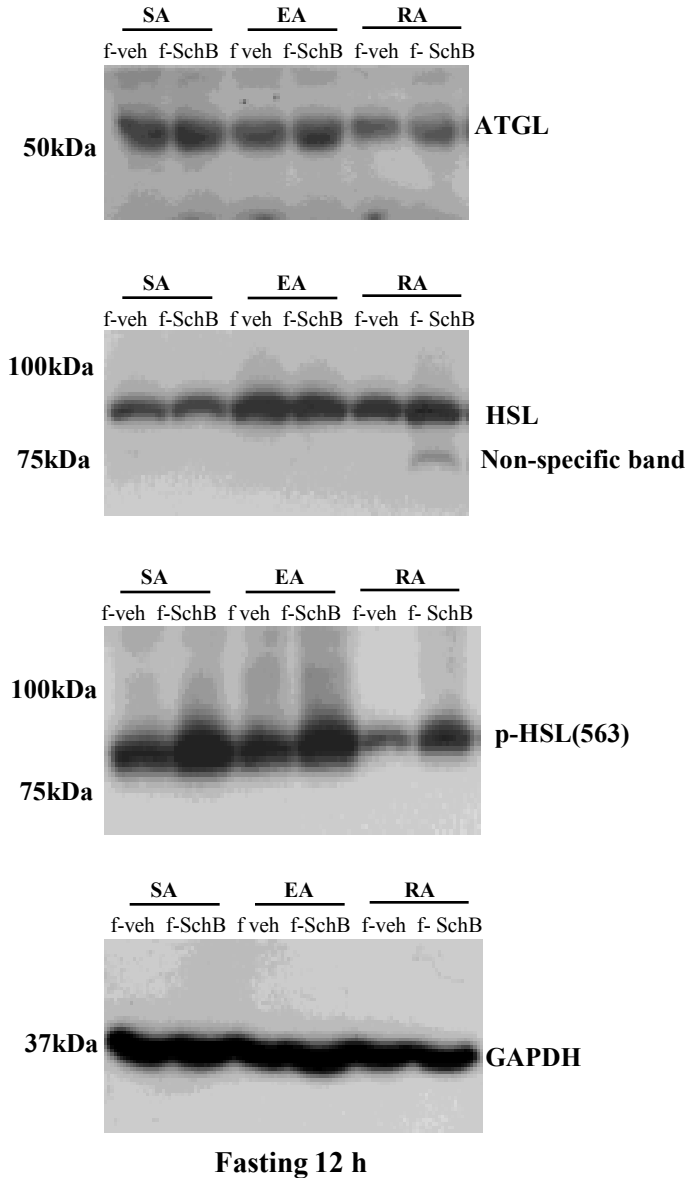**Supplementary S8** SchB treatment induces transient lipolysis in fasting mice

Western blotting showing the expressions of adipose triglyceride lipase (ATGL), hormone sensitive lipase (HSL), phospho-HSL (Ser-563) in adipocytes isolated from the bilateral superficial subcutaneous adipose tissue (SA), prominent bilateral intra-abdominal visceral depots attached to the epididymides (EA) and the perirenal fat (RA) (D-E) 24 h after fasting, (F) 2 h after fasting, (G) 6 h after fasting and (H) 12 h after fasting. nf-veh: non-fasting vehicle control group; nf-SchB: non-fasting SchB-treated group; f-veh: fasting vehicle control group; f-SchB: fasting SchB-treated group; HFD-veh: HFD-fed vehicle control group; HFD-SchB: HFD-fed SchB-treated group.

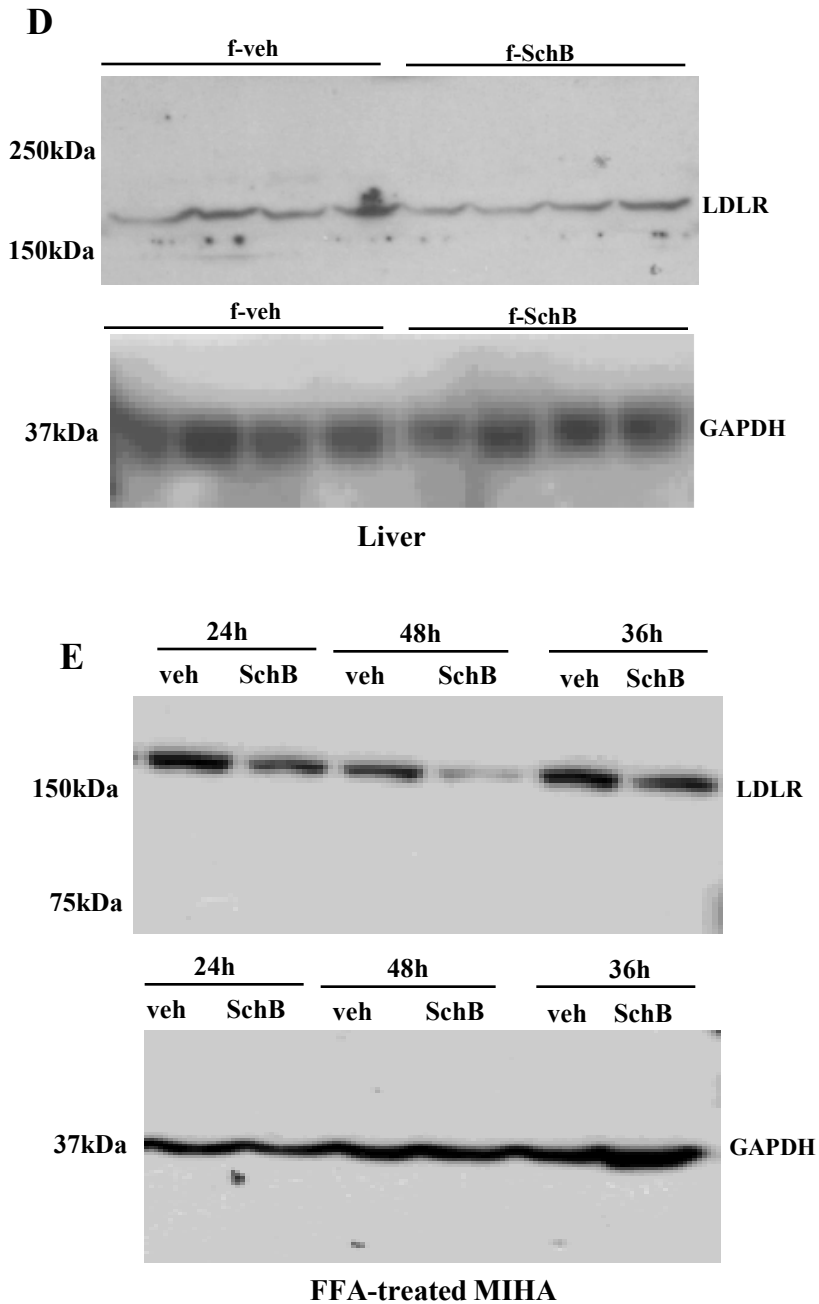

**Supplementary S9** SchB treatment affects the plasma cholesterol levels in fasting mice  
 Expressions of LDL receptor in (D) and in (E) FFA-treated MIHA cells. f-veh: fasting vehicle control group; f-SchB: fasting SchB-treated group.

## Supplementary Table S1 The chromatographic and mass spectrometric parameters for the LC/MS

| Chromatographic parameters      |                                                                                             |
|---------------------------------|---------------------------------------------------------------------------------------------|
| Column                          | Waters Acquity UPLC BEH C18, 2.1x100mm, 1.7 $\mu$ M                                         |
| Column temperature              | 45°C                                                                                        |
| Autosampler temperature         | 10°C                                                                                        |
| Mobile phase                    | A= Water with 10mM Ammonium formate pH4 adjusted by formic acid<br>B= Acetonitrile          |
| Gradient                        | 0% B (0-0.25min)<br>5%B (0.25-1min)<br>20%B (1-10min)<br>60%B (10-22min)<br>99%B (22-26min) |
| Flow rate                       | 0.45 mL/min                                                                                 |
| Injection volume                | 12 $\mu$ l                                                                                  |
| MS parameters                   |                                                                                             |
| Polarity                        | Negative                                                                                    |
| Capillary voltage               | 4.0kV                                                                                       |
| Sheath gas flow rate            | 10 L/min                                                                                    |
| Sheath gas temperature          | 350°C                                                                                       |
| Drying gas flow rate (nitrogen) | 7 L/min                                                                                     |
| Drying gas temperature          | 300°C                                                                                       |
| Nebulizer gas (nitrogen)        | 45 psi                                                                                      |
| Fragmentor voltage              | 140V                                                                                        |
| Nozzle voltage                  | 0V                                                                                          |
| Scanning range                  | 50-1700 m/z                                                                                 |

An Agilent 6540 UHD Accurate-Mass Q-TOF LC/MS mass spectrometer (Agilent Technologies) was connected to an Agilent 1290 Infinity UHPLC via an ESI ion source for the lipids analysis.

**Supplementary Table S2A. The metabolism canonical pathways and identified metabolites in livers of fasting and HFD-fed mouse models**

| ID | Identified lipid species | Formula                      | Regulation directions |                  | Metabolism canonical pathways |                                                                                                                                 |
|----|--------------------------|------------------------------|-----------------------|------------------|-------------------------------|---------------------------------------------------------------------------------------------------------------------------------|
|    |                          |                              | f-schB /f-ctl         | HFD-SchB/HFD-veh |                               |                                                                                                                                 |
| 1  | C02737                   | Phosphatidylethanolserine    | C13H24NO10P           | ↑                | ↑                             | Phosphatidylethanolamine Biosynthesis III                                                                                       |
| 2  | C00344                   | Phosphatidylglycerol         | C8H13O10PR2           | ↓                | ↑                             | Cardiolipin Biosynthesis II; Phosphatidylglycerol Biosynthesis II                                                               |
| 3  | C00157                   | Phosphatidylcholine          | C10H18NO8PR2          | ↑                | ↑                             | Sphingomyelin Metabolism; Choline Biosynthesis II; Phosphatidylcholine Biosynthesis I; Triacylglycerol Biosynthesis             |
| 4  | C00219                   | Arachidonic acid             | C20H32O2              | ↓                | ↓                             | Prostanoid Biosynthesis; Leukotriene Biosynthesis; Anandamide Degradation                                                       |
| 5  | C00712                   | Oleic acid                   | C18H34O2              | NS               | ↓                             | Oleate Biosynthesis                                                                                                             |
| 6  | C00350                   | Phosphatidylethanolamine     | C7H12NO8PR2           | ↑                | ↓                             | Phosphatidylethanolamine Biosynthesis                                                                                           |
| 7  | C05356                   | 5(S)-HPETE                   | C20H32O4              | ↑                | NS                            | Leukotriene Biosynthesis                                                                                                        |
| 8  | C02166                   | Leukotriene C4               | C30H47N3O9S           | ↓                | NS                            | Leukotriene Biosynthesis                                                                                                        |
| 9  | C01595                   | Linoleic acid                | C18H32O2              | ↑                | ↑                             | γ-linolenate Biosynthesis II                                                                                                    |
| 10 | C00165                   | Diacylglycerol               | C5H6O5R2              | ↑                | ↓                             | Triacylglycerol Degradation                                                                                                     |
| 11 | C00416                   | Phosphatidic acid            | C5H7O8PR2             | ↑                | ↓                             | Phosphatidylglycerol Biosynthesis II; Choline Biosynthesis III; Triacylglycerol Biosynthesis; CDP-diacylglycerol Biosynthesis I |
| 12 | C01194                   | 1-phosphatidyl-D-myoinositol | C11H17O13PR2          | ↑                | ↑                             | D-myoinositol (1,4,5)-Trisphosphate Biosynthesis                                                                                |
| 13 | C01530                   | Stearic acid                 | C18H36O2              | ↓                | ↓                             | Stearate Biosynthesis I                                                                                                         |
| 14 | C00249                   | Palmitic acid                | C16H32O2              | ↓                | ↓                             | Palmitate Biosynthesis                                                                                                          |

f-veh: fasting after regular diet-fed vehicle control group; f-schB: fasting after regular diet-fed SchB-treated group; HFD-veh: HFD-fed vehicle control group; HFD-schB: HFD-fed SchB-treated group

**Supplementary Table S2B. The metabolism canonical pathways and identified metabolites in plasma of fasting and HFD-fed mouse models**

| ID | Identified lipid species | Formula                  | Regulation directions |                  | Metabolism canonical pathways |                                                                                                                                                                                                                |
|----|--------------------------|--------------------------|-----------------------|------------------|-------------------------------|----------------------------------------------------------------------------------------------------------------------------------------------------------------------------------------------------------------|
|    |                          |                          | f-schB /f-ctl         | HFD-SchB/HFD-veh |                               |                                                                                                                                                                                                                |
| 1  | C00350                   | Phosphatidylethanolamine | C7H12NO8PR2           | ↓                | ↑                             | Phosphatidylethanolamine<br>Biosynthesis                                                                                                                                                                       |
| 2  | C02737                   | Phosphatidylserine       | C8H12NO10PR2          | ↓                | ↓                             | Phosphatidylethanolamine<br>Biosynthesis                                                                                                                                                                       |
| 3  | C00157                   | Phosphatidylcholine      | C10H18NO8PR2          | ↑                | ↑                             | Choline Biosynthesis III ;Triacylglycerol<br>Biosynthesis;<br>Sphingomyelin<br>Metabolism;<br>Phosphatidylcholine<br>Biosynthesis I                                                                            |
| 4  | C00416                   | Phosphatidic acid        | C5H7O8PR2             | ↑                | NS                            | Choline Biosynthesis III ;<br>Phosphatidylglycerol;<br>Triacylglycerol<br>Biosynthesis; CDP-<br>diacylglycerol<br>biosynthesis I                                                                               |
| 5  | C00344                   | Phosphatidylglycerol     | C8H13O10PR2           | ↑                | ↑                             | Phosphatidylglycerol<br>Biosynthesis II ;<br>Cardiolipin<br>Biosynthesis II                                                                                                                                    |
| 6  | (C00187                  | Cholesterol              | C27H46O               | ↑                | NS                            | Bile Acid Biosynthesis,<br>Neutral Pathway;<br>Cholesterol<br>Biosynthesis I ;<br>Cholesterol<br>Biosynthesis II (via<br>24,25-<br>dihydrolanosterol);<br>Cholesterol<br>Biosynthesis III (via<br>Desmosterol) |
| 7  | C00219                   | Arachidonic acid         | C20H32O2              | ↓                | NS                            | Anandamide<br>Degradation                                                                                                                                                                                      |
| 8  | C00249                   | Palmitic acid            | C16H32O2              | ↑                | NS                            | Palmitate Biosynthesis                                                                                                                                                                                         |
| 9  | C01530                   | Stearic acid             | C18H36O2              | ↑                | NS                            | Stearate Biosynthesis                                                                                                                                                                                          |
| 10 | C00165                   | Diacylglycerol           | C5H6O5R2              | ↑                | ↑                             | Triacylglycerol<br>degradation                                                                                                                                                                                 |

f-veh: fasting after regular diet-fed vehicle control group; f-schB: fasting after regular diet-fed SchB-treated group; HFD-veh: HFD-fed vehicle control group; HFD-schB: HFD-fed SchB-treated group
